# Supplementary material for: Disruption of nuclear speckles reduces chromatin interactions in active compartments
Source: Epigenetics Chromatin. 2019 Jul 17;12:43. doi: 10.1186/s13072-019-0289-2 (PMC6636040; doi:10.1186/s13072-019-0289-2)
Supplement: Supplementary file 8 — Additional file 8: Table S2. Mapping statistics of the Hi-C data. [file 13072_2019_289_MOESM8_ESM.xlsx]

## Sheet: 工作表1
Supp Table2. Mapping statistics of the Hi-C data.
	Srrm2_Ctrl_1	Srrm2_Ctrl_2	Srrm2_KD_1	Srrm2_KD_2
Total Reads	509812972	421406093	580439169	520537537
Side 1 Aligned	453977305	399521398	511321132	493488701
Side 2 Aligned	440601543	386483612	495282450	474424929
Unique Pairs	260950921	238946325	291036279	293470000
Dangling Ends Pairs	12290994	2641342	17131106	3263518
Religation Pairs	3858133	1860464	4593950	2422672
Self circles Pairs	212374	149098	314280	177993
Dumped Pairs	1891884	1701956	2340989	2045076
Duplicate Pairs	37416815	27366706	42860242	33037129
Unique Vaild Pairs	205280721	205226759	223795712	252523612
Unique Vaild Pairs %	0.4026	0.487	0.386	0.4851
cis interaction	149230624	151920539	155733336	180588390
trans interaction	56050097	53306220	68062376	71935222
